# Supplementary material
Source: PubMed Central journal article supplement (PMC2613183)
Supplement: NIHMS83026-supplement-2.pdf [file NIHMS83026-supplement-2.pdf]

### Supplementary Table 1

Primers used in this study

| Primer      | Sequence                                                                     |
|-------------|------------------------------------------------------------------------------|
| PmrL-uf     | 5'-CAATGCTGATGGCGCATTACG-3'                                                  |
| PmrL-ur     | 5'- TTCCCGTTGAATATGGCTCATTGGGACGATACTGAATC-3'                                |
| PmrL-df     | 5'-<br>GATGCTCGATGAGTTTTTCTAAGAAGGAGATATACATATGGGC<br>CT-GATGTGGGGATTATTC-3' |
| PmrL-dr     | 5'-GCCATTCCATTGCCGTTGATAAAG-3'                                               |
| Kan-PmrL-f  | 5'-GATTCAGTATCGTCCCAAATGAGCCATATTCAACGGGAA-3'                                |
| Kan-PmrL-r  | 5'-<br>GAATAATCCCCACATCAGGCCCATATGTATATCTCCTTCTTAG-<br>AAAAACTCATCGAGCATC-3' |
| PmrM-uf     | 5'-CAAGAATCACTTCAGCCAAGCCGC-3'                                               |
| PmrM-ur     | 5'-<br>TTCCCGTTGAATATGGCTCATTACACCGTACTCCCGAGGATC-3'                         |
| PmrM-df     | 5'-<br>GATGCTCGATGAGTTTTTCTAATTACTGAGTTTTCCCTGCCAC-<br>3'                    |
| PmrM-dr     | 5'-GACCATTGTCGGACGTTTAGAC-3'                                                 |
| Kan-PmrM-f  | 5'-<br>GATCCTCGGGAGTACGGTGTAATGAGCCATATTCAACGGGA<br>A-3'                     |
| Kan-PmrM-r  | 5'-<br>GTGGCAGGGAAAACCTCAGTAATTAGAAAACCTCATCGAGCAT<br>C-3'                   |
| PmrLM-uf    | 5'-CAATGCTGATGGCGCATTACG-3'                                                  |
| PmrLM-ur    | 5'- TTCCCGTTGAATATGGCTCATTGGGACGATACTGAATC-3'                                |
| PmrLM-df    | 5'-<br>GATGCTCGATGAGTTTTTCTAATTACTGAGTTTTCCCTGCCAC-<br>3'                    |
| PmrLM-dr    | 5'-GACCATTGTCGGACGTTTAGAC-3'                                                 |
| Kan-PmrLM-f | 5'-GATTCAGTATCGTCCCAAATGAGCCATATTCAACGGGAA-3'                                |
| Kan-PmrLM-r | 5'-<br>GTGGCAGGGAAAACCTCAGTAATTAGAAAACCTCATCGAGCAT<br>C-3'                   |
| ArnT-uf     | 5'-CTAAACATCACGAAGTCGGCCTG-3'                                                |
| ArnT-ur     | 5'-<br>TTCCCGTTGAATATGGCTCATCAGCGACTACCCGCAATTTGTT<br>G-3'                   |
| ArnT-df     | 5'-<br>GATGCTCGATGAGTTTTTCTAAATGATCTGGCTAACATTATCTT<br>TGCC-3'               |
| ArnT-dr     | 5'-CAGTAGTGCTTTCAGCGAAAAGTC -3'                                              |

---

|             |                                                                |
|-------------|----------------------------------------------------------------|
| Kan-ArnT-f  | 5'-<br>CAACAAATTGCGGGTAGTCGCTGATGAGCCATATTCAACGGG<br>AA-3'     |
| Kan-ArnT-r  | 5'-<br>GGCAAAGACTAATGTTAGCCAGATCATTTAGAAAACTCATC<br>GAGCATC-3' |
| pET-PmrL-f  | 5'-GCTAGT <u>CATATGAT</u> GATCTGGCTAACATTAGTCTTTGCC-3'*        |
| pET-PmrL-r  | 5'-GCTAGT <u>CTCGAGTT</u> ACACCGTACTCCCGAGGAT-3'*              |
| pET-PmrM-f  | 5'-GCTAGT <u>CATATGAT</u> GGGCCTGATGTGGGGATTATTC-3'*           |
| pET-PmrM-r  | 5'-GCTAGT <u>CTCGAGTC</u> AGTAACGTTGTTTTGTCGTGGG-3'*           |
| pET-PmrML-f | 5'-GCTAGT <u>CATATGAT</u> GATCTGGCTAACATTAGTCTTTGCC-3'*        |
| pET-PmrML-r | 5'-GCTAGT <u>CTCGAGTC</u> AGTAACGTTGTTTTGTCGTGGG-3'*           |

---

\* Underlined, NdeI site in the forward (f) primer and XhoI site in the reverse (r) primer; boldface, start codon of the gene in forward (f) primer and stop codon of the gene in the reverse (r) primer. Other abbreviations: uf, upstream forward; ur, upstream reverse; df, downstream forward; dr, downstream reverse.
